## 1 **Diet as a major driver of endosymbiont proliferation in cereal weevils**

2 **Authors:** Elisa Dell'Aglio<sup>1,\*</sup>, Virginie Lacotte<sup>2</sup>, Sergio Peignier<sup>2</sup>, Isabelle Rahioui<sup>1</sup>, Fadéla Benzaoui<sup>1</sup>, Agnès  
3 Vallier<sup>1</sup>, Pedro Da Silva<sup>2</sup>, Emmanuel Desouhant<sup>3</sup>, Abdelaziz Heddi<sup>2,\*</sup> and Rita Rebollo<sup>1,\*</sup>

4 <sup>1</sup>Univ Lyon, INRAE, INSA-Lyon, BF2I, UMR 203, 69621 Villeurbanne, France.

5 <sup>2</sup>Univ Lyon, INSA-Lyon, INRAE, BF2I, UMR 203, 69621 Villeurbanne, France.

6 <sup>3</sup>Laboratoire de Biométrie et Biologie Evolutive, UMR5558, Université Lyon 1, Université Lyon, Villeurbanne,  
7 France.

8 \*corresponding authors

9

## 10 **Highlights**

11 - in the cereal weevil *Sitophilus oryzae*, carbohydrate intake triggers an exponential endosymbiont  
12 proliferation in young adults, before a host-controlled endosymbiont clearance;

13 - the host is incapable of adjusting energy allocation to the endosymbionts, even to the detriment of its  
14 own survival;

15 - on a balanced diet, endosymbiont proliferation is dispensable for host fitness (cuticle tanning and  
16 fecundity).

## 17 **Summary**

18 Nutritional symbiosis between insects and intracellular bacteria (endosymbionts) are a major force of  
19 adaptation, allowing animals to colonize nutrient-poor ecological niches<sup>1-6</sup>. Many beetles feeding on  
20 tyrosine-poor substrates rely on a surplus of aromatic amino acids produced by bacterial endosymbionts<sup>7-9</sup>  
21 that synthesize them autotrophically<sup>10-13</sup>. This surplus of aromatic amino acids is crucial for the biosynthesis  
22 of a thick exoskeleton, the cuticle, which is made of a matrix of chitin with proteins and pigments built from  
23 the tyrosine-derived 3,4-dihydroxyphenylalanine (DOPA<sup>14</sup>), providing an important defensive barrier  
24 against biotic and abiotic stress<sup>10,15</sup>. Other endosymbiont-related advantages for beetles include a faster  
25 development<sup>4,16</sup> and improved fecundity<sup>17,18</sup>. The association between the cereal weevil *Sitophilus oryzae*  
26 and *Sodalis pierantonius* endosymbiont<sup>19</sup> represents a unique case study: in young adult weevils,  
27 endosymbionts undergo a massive proliferation concomitant with the cuticle tanning, then they are fully

28 eliminated<sup>20</sup>. While endosymbiont clearance is a host-controlled process<sup>20</sup>, the mechanism triggering  
29 endosymbiont proliferation remains poorly understood. Here, we show that endosymbiont proliferation  
30 relies on host carbohydrate intake. Remarkably, insect fecundity was preserved, and the cuticle tanning  
31 achieved, even when endosymbiont proliferation was experimentally blocked, except in the context of a  
32 severely unbalanced diet. Moreover, a high endosymbiont load coupled with nutrient shortage dramatically  
33 impacts host survival, revealing the high energy cost of proliferating endosymbionts and the incapacity of  
34 the host to adjust energy allocation.

## 35 **Results**

### 36 **Endosymbiont proliferation and endosymbiont-dependent cuticle tanning precede adult emergence**

37 Females of *S. oryzae* lay eggs inside cereal grains, where the progeny develops up to early adulthood (**Fig.**  
38 **1A**). After metamorphosis, gut endosymbionts are located in specialized cells, the bacteriocytes, at the  
39 apices of gut caeca<sup>21</sup>, where they proliferate exponentially before a complete host-controlled clearance<sup>20</sup>.  
40 When adult weevils exit the grain by piercing a hole with their rostrum (*i.e.* emergence), the endosymbiont  
41 load is close to its maximum, while the host cuticle tanning process, measured as a reduction in thorax  
42 redness<sup>11,22</sup>, is about to be completed (**Fig. S1**).

43 To tackle the mechanisms behind endosymbiont proliferation, we have established a semi-artificial rearing  
44 protocol allowing timing and sampling of adults before and after grain emergence. Pupae manually  
45 extracted from grains were maintained on plates while daily monitoring their development (**Fig. 1A**). Adult  
46 stages were defined as follows: adults at stage 1 are orange-colored individuals unable to walk; adults at  
47 stage 2 (six to 12 hours after stage 1) are darker in color but still unable to walk; adults at stage 3 (12-24  
48 hours after stage 2) are brown and mobile; all subsequent developmental stages are daily increments (**Fig.**  
49 **1A**). Flow cytometry quantification of endosymbiont load showed that endosymbiont proliferation started  
50 at stage 4, reaching its maximum at stage 6, while clearance was completed at stage 15 (**Fig. 1B**). In parallel,  
51 we observed the progressive darkening of the cuticle, which reached its maximum a few days after the  
52 higher endosymbiotic load (stage 9, **Fig. 1C**), in agreement with weevils naturally reared on wheat grains  
53 (**Fig. S1**). From a comparison of both color and endosymbiont dynamics of plate-reared insects (**Fig. 1B-C**)  
54 and insects naturally emerged from grains (**Fig. S1**) we identified stage 5.5 as the moment of emergence.

55 We confirmed that endosymbionts are crucial for insect fitness, as cuticle tanning was slower in  
56 aposymbiotic weevils (*i.e.* animals artificially depleted of endosymbionts<sup>4</sup>), never reaching symbiotic levels  
57 (**Fig. S1B** insects naturally emerged from grains; **Fig. 1C** plate-reared insects), even though adult survival  
58 was comparable between symbiotic and aposymbiotic insects in laboratory conditions (**Fig. 1D**).  
59 Furthermore, symbiotic insects laid and developed inside whole wheat flour kernels supplemented with

60 antibiotics lacked endosymbiont proliferation (**Fig. S2A**), and not only showed a lighter cuticle (**Fig. S2B**),  
61 but also a delay in development (**Fig. S2C**) and lower emergence rates (**Fig. S2D**), thus resembling  
62 aposymbiotic animals<sup>4,20</sup>.

### 63 **Endosymbiont proliferation is carbohydrate-dependent and detrimental for host survival when coupled** 64 **with nutrient shortage**

65 Keeping pupae in whole wheat flour supplemented with E133 blue dye resulted in finding the blue dye in  
66 the gut of adult weevils from stage 3, meaning that adult weevils start eating one day before endosymbiont  
67 proliferation (**Fig. 1A**). In agreement with this finding, insects kept on plates without food from the pupal  
68 stage to adult stage 3, then moved to wheat grains, presented a similar endosymbiont dynamics as insects  
69 kept in whole wheat flour from the pupal stage to adult stage 3 (**Fig. 1B**), and no difference in insect  
70 survival was observed (**Fig. 1D**). In contrast, feeding adult weevils only from stage 4 or stage 5 onwards  
71 caused a delay in the endosymbiont proliferation of two and three days, respectively (**Fig. 2A**), while the  
72 overall dynamic profile was unaltered. This suggests that nutrient provision is crucial to sustain  
73 endosymbiont proliferation.

74 We also observed a one-day delay in cuticle tanning of weevils fed from stage 4, and a three-day delay in  
75 weevils fed from stage 5 (**Fig. 2B**). Furthermore, the two-day delay in feeding caused a significant decrease  
76 in insect survival (**Fig. 2C**), while no effect on fecundity (measured using the number of emerging  
77 descendants as a proxy) was observed (**Fig. S3A**). The decrease in survival can be attributed to the  
78 additional cost of harboring the endosymbionts, as no variation in survival rate was observed for starved  
79 aposymbiotic weevils (**Fig. 2D**). Furthermore, when starvation was applied to symbiotic adults taken 15  
80 days after emergence (when the gut endosymbiont population was already cleared, **Fig. S1A**), their survival  
81 was slightly higher than aposymbiotic animals (**Fig. S4**).

82 In a severely unbalanced diet, consisting only of starch (*i.e.* carbohydrates), endosymbiont dynamics was  
83 similar to the control condition (weevils fed with wheat from stage 3, **Fig. 2E**), and the cuticle tanning was  
84 completed faster (**Fig. 2F**), probably thanks to the higher friability of starch grains, which might be easier to  
85 break down and digest than wheat grains. A small endosymbiont gut population persisted until stage 27  
86 (**Fig. S5**), suggesting that the host-controlled clearance<sup>20</sup> can be delayed to extend endosymbiont presence  
87 in an extremely poor environment. Starch diet did not reduce but rather increased symbiotic insect survival  
88 in the first 40 days of adulthood (**Fig. 2G**), although it completely abolished insect reproduction (**Fig. S3B**)  
89 and led to 100% mortality of aposymbiotic weevils (**Fig. 2H**), as previously described<sup>20</sup>.

90 DOPA accumulation was previously suggested as a putative molecular signal for endosymbiont clearance<sup>20</sup>.  
91 Here, the semi-artificial rearing system allowed showing that DOPA increase was concomitant with the

92 endosymbiont clearance rather than anticipating it (**Fig. S6A**), suggesting that DOPA is likely a transient  
93 molecule for mobilizing nitrogen-rich compounds freed by endosymbiont clearance. Indeed, DOPA increase  
94 was delayed by 2-3 days in weevils fed from stage 5 (**Fig. S6A**), coinciding with achieved cuticle tanning and  
95 the onset of endosymbiont clearance. In starch-fed weevils, DOPA levels resembled those of aposymbiotic  
96 weevils (**Fig. S6B**), suggesting that molecules enriched in aromatic amino acids are less abundant and/or  
97 recycled more efficiently than in grain-fed weevils to cope with the shortage of amino acids.

98 Overall, carbohydrate intake appeared necessary and sufficient to trigger endosymbiont proliferation.  
99 Furthermore, higher mortality of young starved symbiotic insects revealed the host incapacity of adjusting  
100 the energy allocated to endosymbiont maintenance.

### 101 **Endosymbiont proliferation is dispensable for cuticle tanning and fecundity when coupled with a** 102 **balanced diet**

103 Since the majority of beetles relying on endosymbionts for cuticle tanning do not show an exponential rise  
104 in endosymbiont load<sup>10-12,23</sup>, we asked whether a smaller endosymbiotic population would ensure cuticle  
105 tanning also in cereal weevils. To do so, we starved weevils at stage 4 and stage 5, after having fed them at  
106 stage 3. This arrested the endosymbiont proliferation, and triggered endosymbiont decrease from stages 5  
107 to 8 (**Fig. 3A**). Remarkably, a second proliferation phase was observed after weevils were fed again, likely  
108 driven by carbohydrate intake, with a maximum load at stage 11 and a complete clearance between stage  
109 15 and 20 (**Fig. 3A**). In both exponential phases, the endosymbiont load reached half the height of the  
110 control condition (weevils fed with wheat from stage 3), suggesting that the total endosymbiont load might  
111 be genetically controlled by the host. The first phase did not result in increased cuticle tanning, with stage 7  
112 weevils still resembling control stage 4 weevils (**Fig. 3B**). In contrast, a few days after the second  
113 proliferation phase, cuticle tanning was fully achieved (stage 12 **Fig. 3B**). Consistently with the hypothesis of  
114 a high metabolic cost associated with endosymbiont proliferation, symbiotic weevils starved between stage  
115 4 and stage 5 displayed 30% mortality, while no increase in mortality was observed for aposymbiotic  
116 weevils equally stressed (**Fig. 3C-D**). Consistently with the hypothesis that DOPA accumulation represents a  
117 transient mobilization of nitrogen-rich storage molecules, two DOPA peaks were observed in concomitance  
118 with the two endosymbiont clearance phases (**Fig. S6C**).

119 We therefore hypothesized that a lower endosymbiont load would be sufficient for cuticle tanning. To test  
120 this, while avoiding additional stress on the host, we fed adult weevils with whole wheat flour kernels  
121 supplemented with a cocktail of antibiotics<sup>4,24</sup>. While control weevils (fed with whole wheat flour kernels  
122 from stage 3) displayed a traditional rise and clearance of endosymbionts, the antibiotic supplementation  
123 triggered only a mild rise of endosymbionts at stage 4, followed by a complete clearance (**Fig. 3E**). With  
124 antibiotic supplementation, we did not observe differences in cuticle tanning (**Fig. 3F**), fecundity (**Fig. S3A**)

125 or survival in symbiotic or aposymbiotic weevils (**Fig. 3G-H**), while DOPA accumulation was slightly reduced,  
126 likely due to the lower endosymbiont load (**Fig. 56D**). The same endosymbiont dynamics was observed for  
127 weevils fed on starch kernels supplemented with antibiotics, except for the fact that, as already noted (**Fig**  
128 **2E**), a small endosymbiotic population was retained longer (**Fig. 3E**). Remarkably, the antibiotic treatment  
129 combined with a severely unbalanced diet (starch only) reduced insect survival of starch-fed symbiotic  
130 animals (**Fig. 3G**), and their cuticle tanning was severely impaired: although faster (*i.e.* completed at stage  
131 5) the process soon stopped at levels comparable to aposymbiotic weevils (**Fig. 3F**).

132 While these findings attested that endosymbiont proliferation is highly energy-consuming and  
133 carbohydrate-dependent, they also revealed that, in the absence of a severely unbalanced diet,  
134 endosymbiont proliferation in young weevils is not required to ensure two of the major advantages known  
135 of this endosymbiosis, *i.e.* improved fecundity and cuticle tanning.

## 136 Discussion

137 By altering or delaying the endosymbiont proliferation in young adult weevils, we observed that a lower  
138 endosymbiont load still guaranteed normal cuticle tanning and fecundity – the two main known symbiotic  
139 advantages for *S. oryzae* – unless coupled with severely unbalanced diet (**Fig. 4**). This is unlikely to occur in  
140 nature, since endosymbiont proliferation occurs when weevils are still located inside cereal grains.  
141 Although we cannot exclude other fitness advantages for the host (*e.g.* stronger protection from  
142 parasites<sup>13,25,26</sup>), we have also shown that endosymbiont proliferation relies on energy availability in the  
143 form of carbohydrates and that the host seems to be incapable of controlling energy allocation to  
144 endosymbionts (**Fig. 4**). Therefore, while endosymbiont clearance is a host-dependent process<sup>20</sup>,  
145 endosymbiont proliferation seems to escape host control.

146 Symbiotic interactions are constantly evolving, in a continuum ranging from parasitism to mutualism,  
147 depending on changes in the interacting species and in their environment<sup>27–31</sup>. In insects, endosymbiont  
148 acquisition generally starts with domestication of parasites or commensals<sup>32</sup>. Host control over  
149 endosymbionts is often observed, as endosymbionts gradually lose the ability of autonomous life through  
150 genome shrinkage<sup>33,34</sup> and point mutations<sup>35</sup>, sometimes retaining only the metabolic pathways that confer  
151 fitness advantage for the host<sup>13</sup>. Endosymbiont loss and/or replacement generally occur in concomitance  
152 with excessive genome shrinkage limiting host advantages<sup>36–39</sup>.

153 Other examples of host-controlled endosymbiont clearance during the host life cycle have been observed<sup>40</sup>.  
154 In contrast, hints of endosymbiont control over the host are rare and usually observed in facultative  
155 endosymbioses. For instance, recent findings have shown that free-living, facultative symbiotic algae are  
156 still able to colonize and proliferate in some species of cnidaria even when impaired in photosynthesis – the

157 main host fitness advantage<sup>41</sup>. This raises the possibility of species-specific events of parasitic-like behavior  
158 of algal endosymbionts in contexts of nutrient shortage, similar to what we have observed for *S.*  
159 *pierantonius*.

160 How can the obligate endosymbiotic nature of *S. pierantonius* be reconciled with its transient parasitic-like  
161 behavior? As in the algal-cnidaria case, this might be the product of a compatible host-bacterium  
162 combination. An alternative, complementary explanation is that the endosymbiont still retains vestigial  
163 characteristics of its previous pathogenic nature, as the acquisition of *S. pierantonius* is recent (~ 28 million  
164 years ago)<sup>19</sup>. *S. pierantonius* retains other elements typical of free-living bacteria, such as a complex  
165 genome<sup>19</sup> containing genes of a type 3 secretion system and a flagellum. These genes are all upregulated  
166 during insect metamorphosis, when the endosymbionts migrate to colonize the cells of the newly-formed  
167 gut caeca<sup>21</sup>, similarly to a pathogen infection. Interestingly, the sister species *Sitophilus zeamais* presents a  
168 similar endosymbiont dynamics, while the related species *Sitophilus granarius* shows lower and more  
169 constant endosymbiont levels in young adults<sup>20</sup>. Comparison of different *Sitophilus* species and their  
170 endosymbionts in various stress conditions, together with artificial endosymbiont replacement and genetic  
171 modification strategies, would provide an ideal model for probing the mechanisms and constraints of  
172 endosymbiont domestication<sup>42,43</sup>.

## 173 Figure legends

174 **Figure 1. Endosymbiont proliferation and endosymbiont-dependent cuticle tanning precede adult**  
175 **emergence. A)** Schematic representation of the natural insect development on grain and the semi-artificial  
176 rearing system, after manual extraction of the pupae from the grains. Each pupa was kept on a well of a  
177 10x10 well-plate (with whole wheat flour or without – control condition) until reaching adult stage 3, then  
178 kept on wheat grains. Insects were observed daily to monitor the development on the basis of cuticle color,  
179 and ability to move and feed. Stage 9 aposymbiotic weevils are also shown for comparison. **B)**  
180 Endosymbiont dynamics of weevils reared on plates from the pupal stage with or without (control  
181 condition) whole flour supplementation until stage 3, then fed on wheat. **C)** Cuticle tanning progress,  
182 measured as a decrease in thorax redness, for plate-reared symbiotic and aposymbiotic weevils. **D)** Survival  
183 curves of aposymbiotic and symbiotic weevils reared as in **B)** and **C)**. Endosymbiont dynamics and cuticle  
184 comparisons were made by two-way ANOVA followed by Turkey's multiple comparison test. Survival curves  
185 were analyzed with the Kaplan-Meier method followed by a Log-rank test. Shaded regions represent 95%  
186 Cl. \*:  $p < 0.05$ , \*\*:  $p < 0.01$ ; \*\*\*:  $p < 0.001$ . Error bars represent standard error of the mean. Orange bars in  
187 **B)** and **C)** depict the day food was provided to control and aposymbiotic insects.

188 **Figure 2. Endosymbiont proliferation is carbohydrate-dependent and detrimental for host survival when**  
189 **coupled with nutrient shortage.** Gut endosymbiont dynamics **(A)** and cuticle tanning progress **(B)** for

190 symbiotic weevils fed with wheat grains from stage 3 onwards (control condition, as in **1B** and **1C**,  
191 respectively), from stage 4, or from stage 5. Colored arrows indicate the stage when food was  
192 administered. **C)** Symbiotic and **D)** aposymbiotic survival curves of weevils fed from stage 4 or 5 in  
193 comparison to control. Gut endosymbiont dynamics (**E)** and cuticle tanning progress (**F)** for weevils fed with  
194 starch grains from day 3 onwards, in comparison to control (as in **1B** and **1C**, respectively). **G)** Symbiotic and  
195 **H)** aposymbiotic survival curves of starch-fed weevils in comparison to control (as in **1D**). Endosymbiont  
196 dynamics and cuticle color comparisons were made by two-way ANOVA followed by Turkey's multiple  
197 comparison test. Survival curves were analyzed with the Kaplan-Meier method followed by Log-rank test.  
198 Shaded regions represent 95% CI. \*:  $p < 0.05$ , \*\*:  $p < 0.01$ ; \*\*\*:  $p < 0.001$ . Error bars represent standard  
199 error of the mean.

200 **Figure 3. Endosymbiont proliferation is dispensable for cuticle tanning and fecundity when coupled with**  
201 **a balanced diet.** Gut endosymbiont dynamics (**A)** and cuticle tanning progress (**B)** for weevils fed with  
202 wheat at stage 3, then starved between stages 4 and 5, in comparison control (as in **1B** and **1C**,  
203 respectively). Colored arrows indicate the stage when food was administered, and the gray area indicates  
204 starvation period. **C)** Symbiotic and **D)** aposymbiotic survival curves of fed, then starved weevils in  
205 comparison to control (as in **1D**). Gut endosymbiont dynamics (**E)** and cuticle tanning progress (**F)** for  
206 weevils fed with wheat kernels supplemented or not (control condition) with antibiotics, or starch kernels  
207 supplemented or not with antibiotics from stage 3 onwards. **G)** Symbiotic and **H)** aposymbiotic survival  
208 curves of weevils fed with wheat kernels supplemented or not (control condition) with antibiotics, or starch  
209 kernels supplemented or not with antibiotics from stage 3 onwards. Endosymbiont dynamics and cuticle  
210 color comparisons were made by two-way ANOVA followed by Turkey's multiple comparison test. Survival  
211 curves were analyzed with the Kaplan-Meier method followed by Log-rank test. Shaded regions represent  
212 95% CI. \*:  $p < 0.05$ , \*\*:  $p < 0.01$ ; \*\*\*:  $p < 0.001$ . Error bars represent standard error of the mean.

213 **Figure 4: Cost/Benefits and main controlling partners at various stages of the *S. oryzae/S. pierantonius***  
214 **symbiosis.** The host-independent endosymbiont rise in young adult weevils can be detrimental,  
215 advantageous or neutral for host development and fecundity, depending on the diet. Endosymbiont rise is  
216 followed by host-controlled bacterial clearance that leads to energy recycle.

## 217 **Acknowledgements**

218 This work was funded by the ANR UNLEASH (ANR UNLEASH-CE20-0015-01 - R. Rebollo). We thank Aurélien  
219 Vigneron, Martin Kaltenpoth and Tobias Engl for interesting discussions.

## 220 **Authors contribution**

221 Conceptualization: EDA, AH, RR; Methodology: EDA, VL, SP, IR, FB, AV; Writing: EDA, ED, AH, RR;  
222 Visualization: EDA, RR; Supervision: PDS, ED, AH, RR; Funding acquisition: RR.

223

## 224 **Declaration of interest**

225 The authors declare no conflict of interest.

## 226 **STAR Methods**

### 227 **Insect rearing and growth conditions**

228 Symbiotic and aposymbiotic *S. oryzae* insects were fed with organic wheat grains sterilized at -80 °C. Insects  
229 were kept in plastic boxes in a stove at 27 °C and 70% relative humidity, in the dark.

230 For antibiotic supplementation experiments, wheat flour kernels were prepared using commercial whole  
231 wheat flour (Francine, France) or starch (Stijfsel Remy, Belgium), with the addition of 0.1% (v/v) of  
232 chlortetracycline (Sigma-Aldrich) and 0.5% (v/v) penicillin G (Sigma-Aldrich). To prepare the kernels,  
233 flour/starch and, when needed, antibiotics were mixed with water (q.s.) to make a smooth dough. The  
234 dough was spread on a plastic surface and dried overnight at room temperature, then cut in little round  
235 pieces (kernels) and stored at 4°C before use.

236 For analysis of insect development on antibiotic-supplemented whole wheat flour kernels, two-week-old  
237 symbiotic and aposymbiotic adult weevils (n= 50) were fed for 24 hours with 20 whole wheat flour kernels  
238 (supplemented or not with antibiotics), then insects were removed and the kernels were kept in the  
239 incubator and observed daily to monitor: the day of progeny emergence, the number of emergents, the  
240 endosymbiont load at emergence as well as the thorax cuticle color 12 days after emergence.

241 To monitor the moment adult weevils start eating after metamorphosis, pupae were manually extracted  
242 from grains and kept in plate wells with whole flour supplemented with E133 dye (100 µl of dye for 3.5 g  
243 flour). The E133 dye was first mixed with the flour with water (q.s.), let dry at room temperature overnight  
244 and then grinded. Guts of insects corresponding to various developmental stages (from stage 1 to stage 9)  
245 were dissected and observed with light microscopy.

### 246 **Endosymbiont quantification by flow cytometry**

247 The protocol for endosymbiont quantification was modified from Login et al., 2011<sup>44</sup>. Briefly, a minimum of  
248 three pools (per condition and developmental stage) of four midguts each were dissected in TA buffer (25



249 mM KCl, 10 mM MgCl<sub>2</sub>, 250 mM sucrose and 35 mM Tris/HCl, pH 7.5). The samples were manually grinded  
250 in 100 µl TA buffer up to homogenization and centrifuged at 0.5 rpm for 2 minutes to sediment impurities.  
251 The supernatant was diluted in 400 µl TA buffer, then filtered with a 40 µm Flowmi filter (SP Scienceware)  
252 and centrifuged at 10 000 rpm for five minutes. The supernatant was discarded and the pellet was kept at  
253 4°C in 4% paraformaldehyde (PFA, Electron Microscopy Science) before analysis.

254 Before quantification, pellets were centrifuged at 11 000 rpm for 20 minutes at 4°C, the PFA supernatant  
255 was discarded and samples were resuspended in 700 µl ultrapure water and 0.08% of SYTO9 dye  
256 (Invitrogen). additional water dilutions were made if the bacterial concentration was above the detection  
257 limit of the instrument.

258 Quantification was performed with BD Accuri C6 Plus cytometer (flow: 14 µl/min for 1 minute, cutoff at  
259 6000). Normalization was obtained by subtracting the values obtained from guts of aposymbiotic weevils.  
260 All measurements performed for endosymbiont load analyses are independent from measurements of  
261 cuticle color, insect survival, fecundity and DOPA quantifications.

## 262 **Analysis of cuticle color**

263 The cuticle darkening process was monitored at various insect stages and conditions by using the  
264 Natsumushi software v. 1.10<sup>11,22</sup> on pictures taken with an Olympus XC50 camera attached to a Leica  
265 MZFLIII binocular and the CellF software (Olympus Soft Imaging System) under the same lightning  
266 conditions. Quantification was performed as illustrated in Anbutsu et al., 2017<sup>11</sup> using the thorax region,  
267 because of its color uniformity. Briefly, pixels with brightness over top 10% or below bottom 10% were  
268 excluded from analysis. Then RGB values for all (= n) pixels were measured and averaged by  $\Sigma (R - \text{mean} [R,$   
269  $G, B])/n$  to obtain the proxy redness thorax mean value. Eight to 15 individuals were measured per  
270 condition and stage. All measurements performed for cuticle color analyses are independent from  
271 measurements of endosymbiont load, insect survival, fecundity and DOPA quantifications.

## 272 **Survival measurements**

273 For plate-reared weevils, insects were isolated at pupal stage on plate wells and assigned to a specific diet  
274 (n = 100 insects per diet condition, of mixed sexes, unsexed individuals) starting at adult stage 3, with the  
275 exception of whole flour reared weevils of Fig. 1B and Fig. 1D, which were reared on whole wheat flour  
276 from the pupal stage up to adult stage 3. Dead weevils were counted daily between stage 4 and stage 10,  
277 then weekly up to stage 40.

278 For weevils naturally emerging from grains, insects were isolated at emergence, kept for two weeks and  
279 then starved for two days. Dead weevils were counted daily from the 16<sup>th</sup> to the 22<sup>nd</sup> day after emergence,  
280 then once per week up to the 44<sup>th</sup> day after emergence.

281 All measurements performed for cuticle insect survival are independent from measurements of  
282 endosymbiont load, color analyses, fecundity and DOPA quantifications.

### 283 **Fecundity**

284 We used the number of emerging descendants as a proxy to measure insect fecundity of plate-reared  
285 symbiotic and aposymbiotic weevils, as well as weevils fed from stage 5, starch-fed weevils and antibiotic-  
286 fed weevils. Fifteen couples of randomly-paired male/female weevils per condition were established at  
287 stage 3. Then, weevils were subjected to the specific diet condition up to stage 8. At this point, antibiotic-  
288 fed weevils were shifted to the control diet (wheat grains). From stage 8 up to stage 45, the diet was  
289 changed every 3, 4 or 5 days (20 kernels each time). All wheat or starch grains were kept for two months to  
290 allow the emergence and counting of the progeny.

291 All measurements performed for fecundity analyses are independent from measurements of endosymbiont  
292 load, cuticle color, insect survival and DOPA quantifications.

### 293 **DOPA measurements**

294 Measurements of free DOPA were performed on pools of frozen weevils (each pool made of three weevils)  
295 and the analysis was performed on three to five replicates per condition and stage. The whole weevil body  
296 was used for the analysis. Measurements were performed as in Vigneron et al., 2014<sup>20</sup>, using norvaline as  
297 an internal standard and a reverse phase HPLC method with a C18 column (Zorbax Eclipse-AAA 3.5  $\mu$ m, 150  
298 x 4.6 mm, Agilent Technologies).

299 All measurements performed for DOPA analyses are independent from measurements of endosymbiont  
300 load, cuticle color, insect survival and fecundity.

### 301 **Supplemental information**

302 **Figure S1. Endosymbiont dynamics and cuticle tanning in grain-reared weevils.** Gut endosymbiont  
303 dynamics **(A)** and cuticle tanning progress **(B)** for weevils which developed in wheat grains and emerged  
304 spontaneously as adults. Results confirm and extend previous findings<sup>20</sup>. Red bar: emergence (E) from  
305 grain. All subsequent time points (E+X) represent days after emergence. Cuticle color comparisons between  
306 symbiotic and aposymbiotic weevils were made by two-way ANOVA followed by Turkey's multiple  
307 comparison test. \*:  $p < 0.05$ , \*\*:  $p < 0.01$ , \*\*\*:  $p < 0.001$ . Error bars represent standard error of the mean.

308 **Figure S2: Symbiotic weevils on whole wheat flour kernels supplemented with antibiotics resemble**  
309 **aprosymbiotic weevils.** A group of 100 symbiotic or aposymbiotic weevils were left for 24 hours with 30  
310 whole wheat flour kernels supplemented or not with antibiotics. The weevils were then removed and the  
311 kernels kept for monitoring: **A)** endosymbiont load at emergence, **B)** thorax redness at 12 days after  
312 emergence, **C)** day of progeny emergence from grain and **D)** egg laying rate for symbiotic insects laid in  
313 whole wheat flour kernels (See STAR Methods) supplemented (red) or not (mustard) with antibiotics,  
314 compared to aposymbiotic insects fed in the same way. Comparisons were performed by Kruskal-Wallis  
315 test, or t-test for experiments with only two populations. \*:  $p < 0.05$ , \*\*:  $p < 0.01$ ; \*\*\*:  $p < 0.001$ . Error bars  
316 represent standard error of the mean.

317 **Figure S3: Comparison of insect fecundity under various stress treatments.** **A)** Couples of one male-one  
318 female eight-day old weevils fed with wheat grains from stage 3 onwards (control condition), fed from  
319 stage 5, antibiotic-treated, or aposymbiotic weevils were reared on twenty wheat grains. The batch of  
320 grains was changed every 3 to 5 days, until weevils reached 45 days of age. The effect of each condition on  
321 fecundity was calculated with a mixed-effect model with Geisser-Greenhouse correction followed by a  
322 Turkey's multiple comparison test (with fixed batch variable). \*:  $p < 0.05$ , \*\*:  $p < 0.01$ ; \*\*\*:  $p < 0.001$ . Error  
323 bars represent standard error of the mean. **B)** Ovaries of stage 24 control weevils or weevils fed on starch  
324 from stage 3 onwards. The starch-fed weevils did not correctly develop the ovaries, and no eggs/progeny  
325 were retrieved from the starch kernels.

326 **Figure S4: Effect of starvation on adult weevils after endosymbiont clearance.** Symbiotic and aposymbiotic  
327 weevils at 15 days after emergence were either **(A)** kept on wheat grains or **(B)** starved for two days (E+16-  
328 E+17) before being fed again with wheat grains. Grey region represents the starvation period. Survival  
329 comparison between symbiotic and aposymbiotic weevils until E+44 was performed with the Kaplan-Meier  
330 method followed by Log-rank test. Shaded regions represent 95% CI. \*:  $p < 0.05$ , \*\*:  $p < 0.01$ ; \*\*\*:  $p <$   
331  $0.001$ . Error bars represent standard error of the mean.

332 **Figure S5: Extended endosymbiont survival in condition of severe unbalanced diet.** Prolonged  
333 endosymbiont dynamic profile of starch-fed weevils from stage 3 onwards compared to control weevils  
334 (fed with wheat grains from stage 3 onwards). Note the retention of a small endosymbiont population until  
335 stage 25.

336 **Figure S6: In symbiotic weevils, free DOPA levels increase during endosymbiont clearance except in**  
337 **conditions of severely unbalanced diet.** Free DOPA levels in the whole insect bodies were measured for  
338 weevils subjected to various stress treatments. **A)** control weevils (fed with wheat grains from stage 3) and  
339 weevils fed from stage 5; **B)** control weevils (as in **A)**, aposymbiotic weevils and weevils fed on starch from  
340 stage 3; **C)** fed, then starved weevils and control weevils (as in **A)**; **D)** weevils fed on wheat or starch kernels

341 supplemented or not with antibiotics. Here, the wheat kernel diet from stage 3 represents the control  
342 condition. Comparisons were performed by two-way ANOVA followed by Turkey's multiple comparison  
343 test. \*:  $p < 0.05$ , \*\*:  $p < 0.01$ ; \*\*\*:  $p < 0.001$ . Error bars represent standard error of the mean.

344

- 345 1. Salem, H., and Kaltenpoth, M. (2022). Beetle-Bacterial Symbioses: Endless Forms Most Functional.  
346 *Annu Rev Entomol* 67, 201–219.
- 347 2. Aksoy, S., Caccone, A., Galvani, A.P., and Okedi, L.M. (2013). *Glossina fuscipes* populations  
348 provide insights for human African trypanosomiasis transmission in Uganda. *Trends Parasitol* 29, 394–406.
- 349 3. Wilson, A.C.C., Ashton, P.D., Calevro, F., Charles, H., Colella, S., Febvay, G., Jander, G., Kushlan,  
350 P.F., Macdonald, S.J., Schwartz, J.F., et al. (2010). Genomic insight into the amino acid relations of the pea  
351 aphid, *Acyrtosiphon pisum*, with its symbiotic bacterium *Buchnera aphidicola*. *Insect Mol Biol* 19 *Suppl* 2,  
352 249–258.
- 353 4. Heddi, A., Grenier, A.-M., Khatchadourian, C., Charles, H., and Nardon, P. (1999). Four  
354 intracellular genomes direct weevil biology: Nuclear, mitochondrial, principal endosymbiont, and  
355 *Wolbachia*. *Proceedings of the National Academy of Sciences* 96, 6814–6819.
- 356 5. Henry, L.M., Peccoud, J., Simon, J.-C., Hadfield, J.D., Maiden, M.J.C., Ferrari, J., and Godfray,  
357 H.C.J. (2013). Horizontally Transmitted Symbionts and Host Colonization of Ecological Niches. *Current*  
358 *Biology* 23, 1713–1717.
- 359 6. Parish, A.J., Rice, D.W., Tanquary, V.M., Tennessen, J.M., and Newton, I.L.G. (2022). Honey bee  
360 symbiont buffers larvae against nutritional stress and supplements lysine. *The ISME Journal*.
- 361 7. Douglas, A.E. (2015). Multiorganismal insects: diversity and function of resident microorganisms.  
362 *Annu Rev Entomol* 60, 17–34.
- 363 8. Gil, R., Sabater-Muñoz, B., Latorre, A., Silva, F.J., and Moya, A. (2002). Extreme genome reduction  
364 in *Buchnera* spp.: Toward the minimal genome needed for symbiotic life. *Proceedings of the National*  
365 *Academy of Sciences* 99, 4454–4458.
- 366 9. Gil, R., and Latorre, A. (2019). Unity Makes Strength: A Review on Mutualistic Symbiosis in  
367 Representative Insect Clades. *Life (Basel)* 9.
- 368 10. Engl, T., Eberl, N., Gorse, C., Krüger, T., Schmidt, T.H.P., Plarre, R., Adler, C., and Kaltenpoth, M.  
369 (2018). Ancient symbiosis confers desiccation resistance to stored grain pest beetles. *Mol Ecol* 27, 2095–  
370 2108.
- 371 11. Anbutsu, H., Moriyama, M., Nikoh, N., Hosokawa, T., Futahashi, R., Tanahashi, M., Meng, X.-Y.,  
372 Kuriwada, T., Mori, N., Oshima, K., et al. (2017). Small genome symbiont underlies cuticle hardness in  
373 beetles. *Proceedings of the National Academy of Sciences* 114, E8382–E8391.
- 374 12. Hirota, B., Okude, G., Anbutsu, H., Futahashi, R., Moriyama, M., Meng, X.-Y., Nikoh, N., Koga, R.,  
375 and Fukatsu, T. (2017). A Novel, Extremely Elongated, and Endocellular Bacterial Symbiont Supports  
376 Cuticle Formation of a Grain Pest Beetle. *mBio* 8.
- 377 13. Muhammad, A., Habineza, P., Ji, T., Hou, Y., and Shi, Z. (2019). Intestinal Microbiota Confer  
378 Protection by Priming the Immune System of Red Palm Weevil *Rhynchophorus ferrugineus* Olivier  
379 (Coleoptera: Dryophthoridae). *Front Physiol* 10, 1303.

- 380 14. Noh, M.Y., Muthukrishnan, S., Kramer, K.J., and Arakane, Y. (2016). Cuticle formation and  
381 pigmentation in beetles. *Curr Opin Insect Sci* 17, 1–9.
- 382 15. Kanyile, S.N., Engl, T., and Kaltenpoth, M. (2022). Nutritional symbionts enhance structural  
383 defence against predation and fungal infection in a grain pest beetle. *J Exp Biol* 225.
- 384 16. Shukla, S.P., Plata, C., Reichelt, M., Steiger, S., Heckel, D.G., Kaltenpoth, M., Vilcinskas, A., and  
385 Vogel, H. (2018). Microbiome-assisted carrion preservation aids larval development in a burying beetle.  
386 *Proc Natl Acad Sci U S A* 115, 11274–11279.
- 387 17. Engl, T., Schmidt, T.H.P., Kanyile, S.N., and Klebsch, D. (2020). Metabolic Cost of a Nutritional  
388 Symbiont Manifests in Delayed Reproduction in a Grain Pest Beetle. *Insects* 11.
- 389 18. Rozen, D.E., Engelmoer, D.J.P., and Smiseth, P.T. (2008). Antimicrobial strategies in burying  
390 beetles breeding on carrion. *Proc Natl Acad Sci U S A* 105, 17890–17895.
- 391 19. Oakeson, K.F., Gil, R., Clayton, A.L., Dunn, D.M., von Niederhausern, A.C., Hamil, C., Aoyagi, A.,  
392 Duval, B., Baca, A., Silva, F.J., et al. (2014). Genome degeneration and adaptation in a nascent stage of  
393 symbiosis. *Genome Biol Evol* 6, 76–93.
- 394 20. Vigneron, A., Masson, F., Vallier, A., Balmand, S., Rey, M., Vincent-Monégat, C., Aksoy, E.,  
395 Aubailly-Giraud, E., Zaidman-Rémy, A., and Heddi, A. (2014). Insects recycle endosymbionts when the  
396 benefit is over. *Curr Biol* 24, 2267–2273.
- 397 21. Maire, J., Parisot, N., Galvao Ferrarini, M., Vallier, A., Gillet, B., Hughes, S., Balmand, S., Vincent-  
398 Monégat, C., Zaidman-Rémy, A., and Heddi, A. (2020). Spatial and morphological reorganization of  
399 endosymbiosis during metamorphosis accommodates adult metabolic requirements in a weevil. *Proc Natl*  
400 *Acad Sci U S A* 117, 19347–19358.
- 401 22. Tanahashi, M., and Fukatsu, T. (2018). Natsumushi: Image measuring software for entomological  
402 studies. *Entomological Science* 21, 347–360.
- 403 23. Kiefer, J.S.T., Batsukh, S., Bauer, E., Hirota, B., Weiss, B., Wierz, J.C., Fukatsu, T., Kaltenpoth, M.,  
404 and Engl, T. (2021). Inhibition of a nutritional endosymbiont by glyphosate abolishes mutualistic benefit on  
405 cuticle synthesis in *Oryzaephilus surinamensis*. *Commun Biol* 4, 554.
- 406 24. Baker, J.E., and Lum, P.T.M. (1973). Development of aposymbiosis in larvae of *Sitophilus oryzae*  
407 (Coleoptera: Curculionidae) by dietary treatment with antibiotics. *Journal of Stored Products Research* 9,  
408 241–245.
- 409 25. Kaltenpoth, M., Göttler, W., Herzner, G., and Strohm, E. (2005). Symbiotic Bacteria Protect Wasp  
410 Larvae from Fungal Infestation. *Current Biology* 15, 475–479.
- 411 26. Wang, Y., and Rozen, D.E. (2018). Gut microbiota in the burying beetle, *Nicrophorus vespilloides*,  
412 provide colonization resistance against larval bacterial pathogens. *Ecol Evol* 8, 1646–1654.
- 413 27. Moran, N.A., and Yun, Y. (2015). Experimental replacement of an obligate insect symbiont. *Proc*  
414 *Natl Acad Sci U S A* 112, 2093–2096.
- 415 28. Apprill, A. (2020). The Role of Symbioses in the Adaptation and Stress Responses of Marine  
416 Organisms. *Annual Review of Marine Science* 12, 291–314.
- 417 29. Werner, G.D.A., Cornelissen, J.H.C., Cornwell, W.K., Soudzilovskaia, N.A., Kattge, J., West, S.A.,  
418 and Kiers, E.T. (2018). Symbiont switching and alternative resource acquisition strategies drive mutualism  
419 breakdown. *Proceedings of the National Academy of Sciences* 115, 5229–5234.

- 420 30. Manzano-Marín, A., Coeur d'acier, A., Clamens, A.-L., Orvain, C., Cruaud, C., Barbe, V., and  
421 Jousset, E. (2020). Serial horizontal transfer of vitamin-biosynthetic genes enables the establishment of  
422 new nutritional symbionts in aphids' di-symbiotic systems. *The ISME Journal* *14*, 259–273.
- 423 31. Waneka, G., Vasquez, Y.M., Bennett, G.M., and Sloan, D.B. (2021). Mutational Pressure Drives  
424 Differential Genome Conservation in Two Bacterial Endosymbionts of Sap-Feeding Insects. *Genome*  
425 *Biology and Evolution* *13*, evaa254.
- 426 32. Steinert, M., Hentschel, U., and Hacker, J. (2000). Symbiosis and pathogenesis: evolution of the  
427 microbe-host interaction. *Naturwissenschaften* *87*, 1–11.
- 428 33. Alleman, A., Hertweck, K.L., and Kambhampati, S. (2018). Random Genetic Drift and Selective  
429 Pressures Shaping the Blattabacterium Genome. *Scientific Reports* *8*, 13427.
- 430 34. Moran, N.A., and Mira, A. (2001). The process of genome shrinkage in the obligate symbiont  
431 *Buchnera aphidicola*. *Genome Biology* *2*, research0054.1.
- 432 35. Koga, R., Moriyama, M., Onodera-Tanifuji, N., Ishii, Y., Takai, H., Mizutani, M., Oguchi, K.,  
433 Okura, R., Suzuki, S., Goto, Y., et al. (2022). Single mutation makes *Escherichia coli* an insect  
434 mutualist. *bioRxiv*, 2022.01.26.477692.
- 435 36. Chong, R.A., and Moran, N.A. (2018). Evolutionary loss and replacement of *Buchnera*, the obligate  
436 endosymbiont of aphids. *The ISME Journal* *12*, 898–908.
- 437 37. Koga, R., Bennett, G.M., Cryan, J.R., and Moran, N.A. (2013). Evolutionary replacement of obligate  
438 symbionts in an ancient and diverse insect lineage. *Environ Microbiol* *15*, 2073–2081.
- 439 38. Mao, M., and Bennett, G.M. (2020). Symbiont replacements reset the co-evolutionary relationship  
440 between insects and their heritable bacteria. *The ISME Journal* *14*, 1384–1395.
- 441 39. Fisher, R.M., Henry, L.M., Cornwallis, C.K., Kiers, E.T., and West, S.A. (2017). The evolution of  
442 host-symbiont dependence. *Nature Communications* *8*, 15973.
- 443 40. Simonet, P., Gaget, K., Balmand, S., Lopes, M.R., Parisot, N., Buhler, K., Dupont, G., Vulsteke, V.,  
444 Febvay, G., Heddi, A., et al. (2018). Bacteriocyte cell death in the pea aphid/*Buchnera* symbiotic system.  
445 *Proceedings of the National Academy of Sciences* *115*, E1819–E1828.
- 446 41. Jinkerson, R.E., Russo, J.A., Newkirk, C.R., Kirk, A.L., Chi, R.J., Martindale, M.Q., Grossman,  
447 A.R., Hatta, M., and Xiang, T. (2022). Cnidarian-Symbiodiniaceae symbiosis establishment is independent  
448 of photosynthesis. *Curr Biol* *32*, 2402-2415.e4.
- 449 42. Chomicki, G., Kiers, E.T., and Renner, S.S. (2020). The Evolution of Mutualistic Dependence.  
450 *Annu. Rev. Ecol. Evol. Syst.* *51*, 409–432.
- 451 43. Klein, M., Stewart, J.D., Porter, S.S., Weedon, J.T., and Kiers, E.T. (2021). Evolution of  
452 manipulative microbial behaviors in the rhizosphere. *Evolutionary Applications* *n/a*.
- 453 44. Login, F.H., Balmand, S., Vallier, A., Vincent-Monégat, C., Vigneron, A., Weiss-Gayet, M., Rochat,  
454 D., and Heddi, A. (2011). Antimicrobial peptides keep insect endosymbionts under control. *Science* *334*,  
455 362–365.
- 456

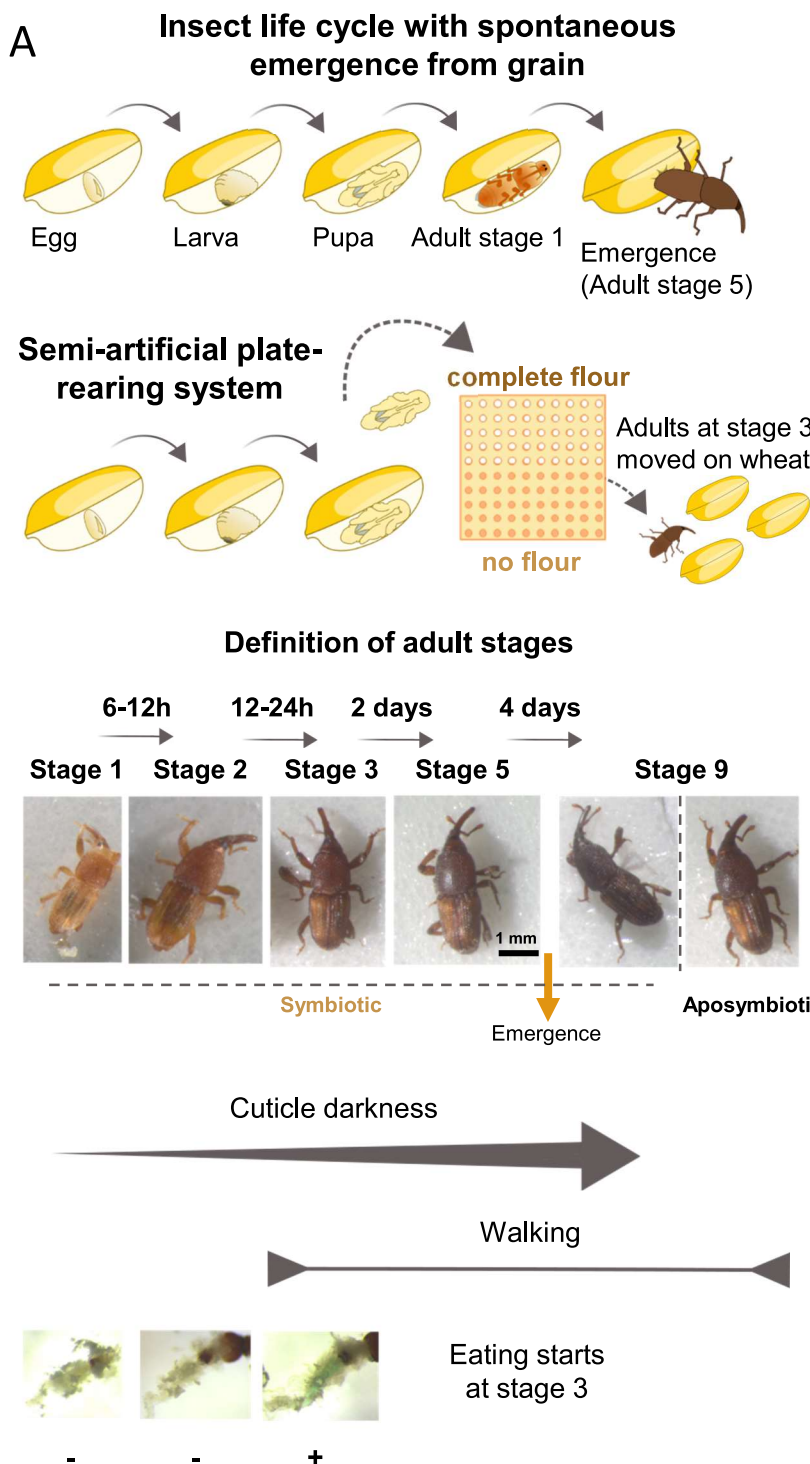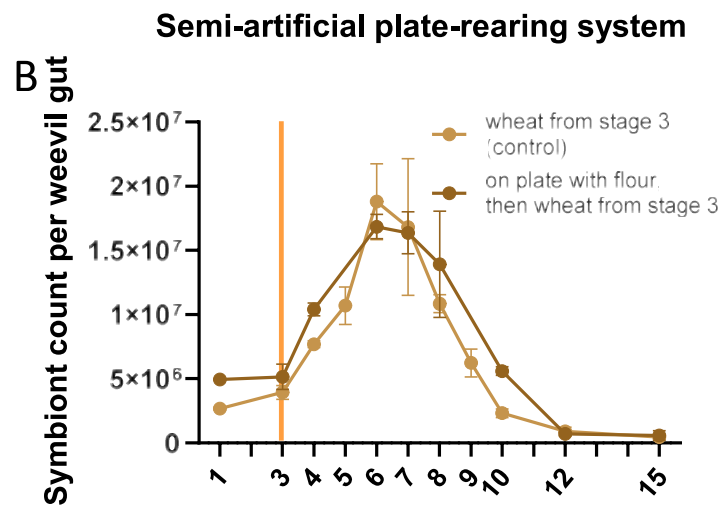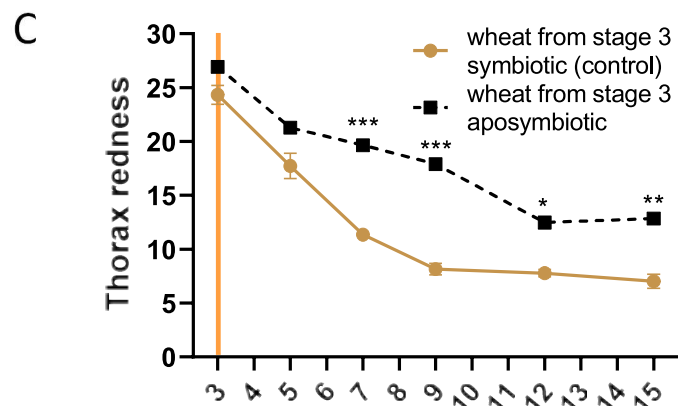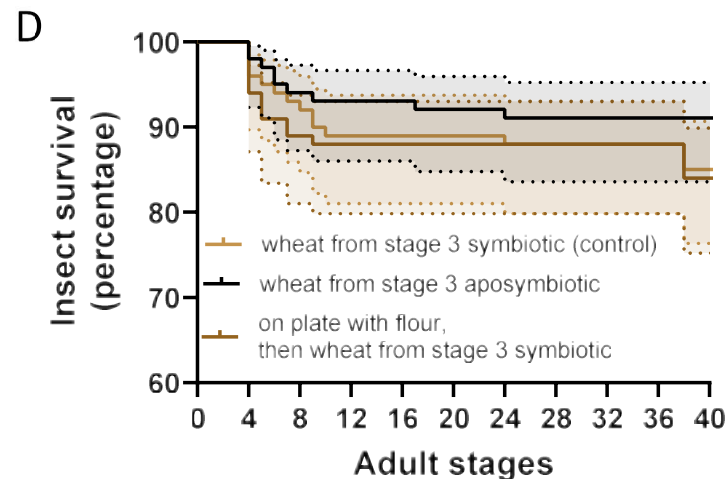

Plate rearing

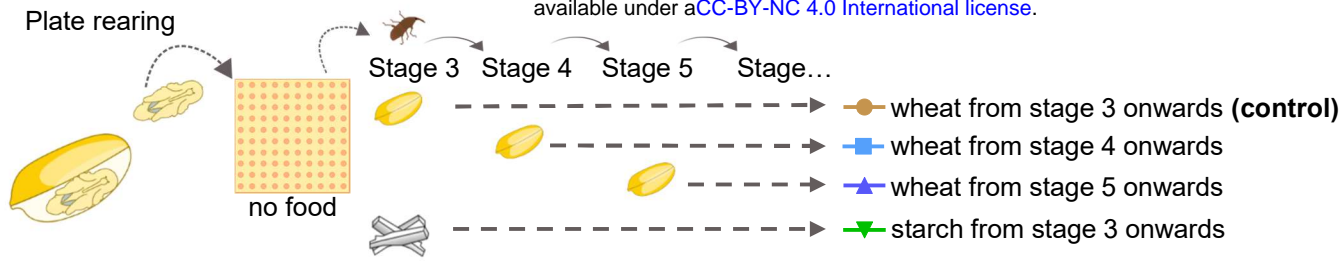

Fig. 2

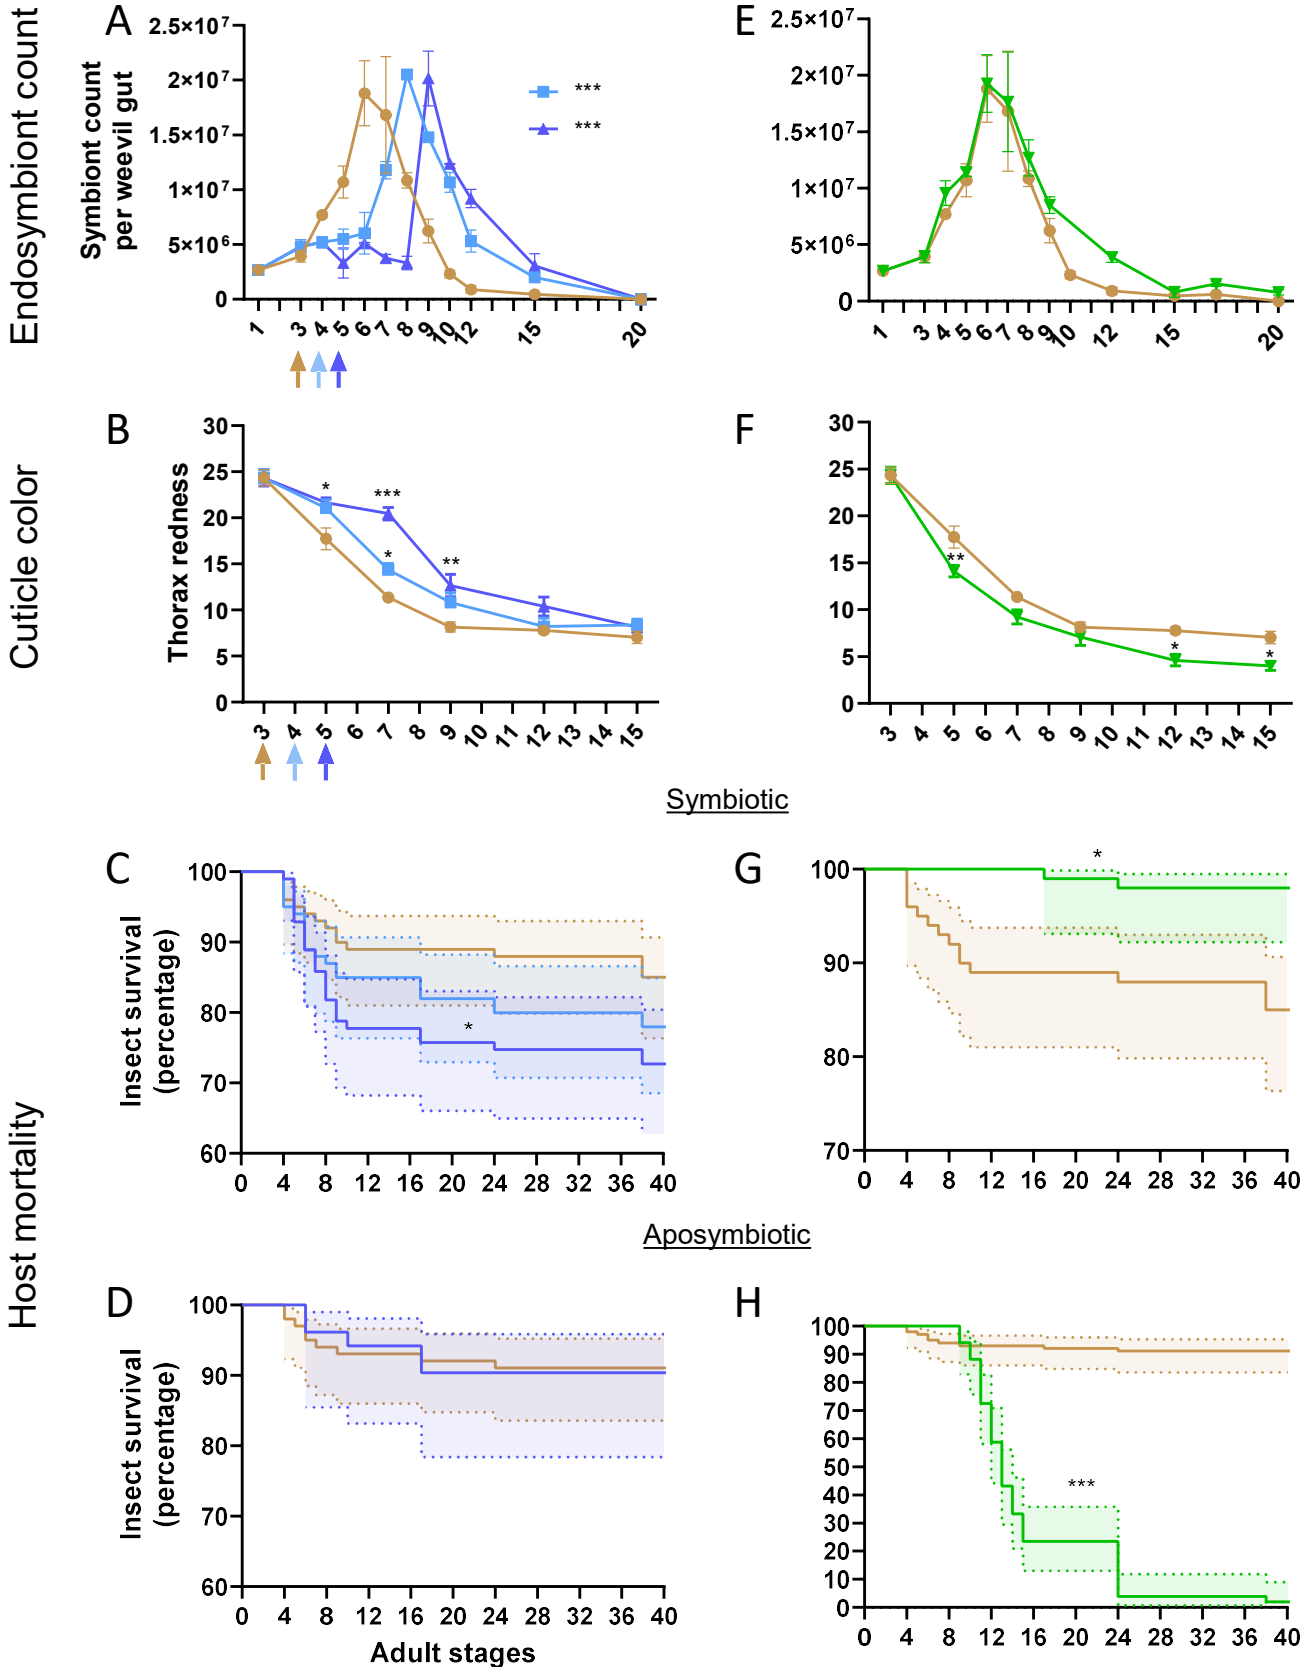



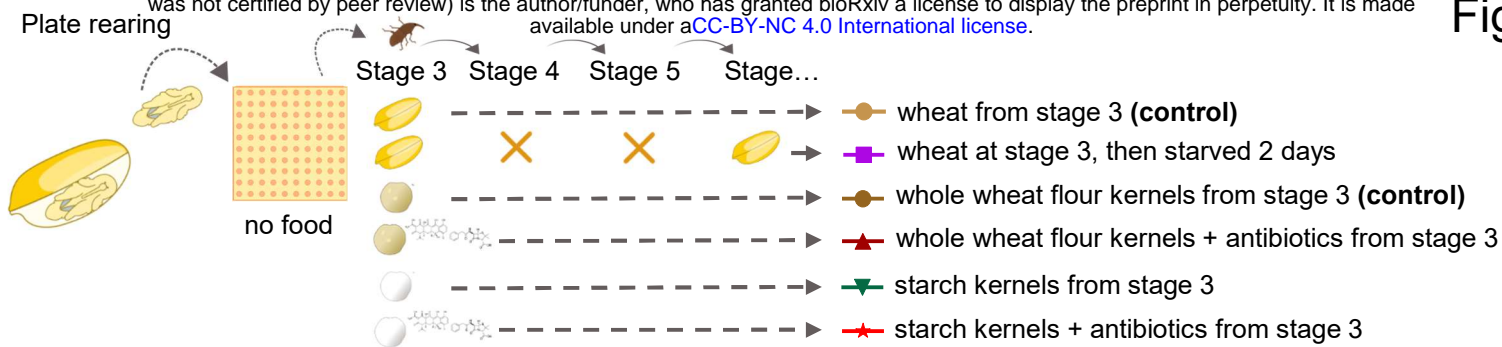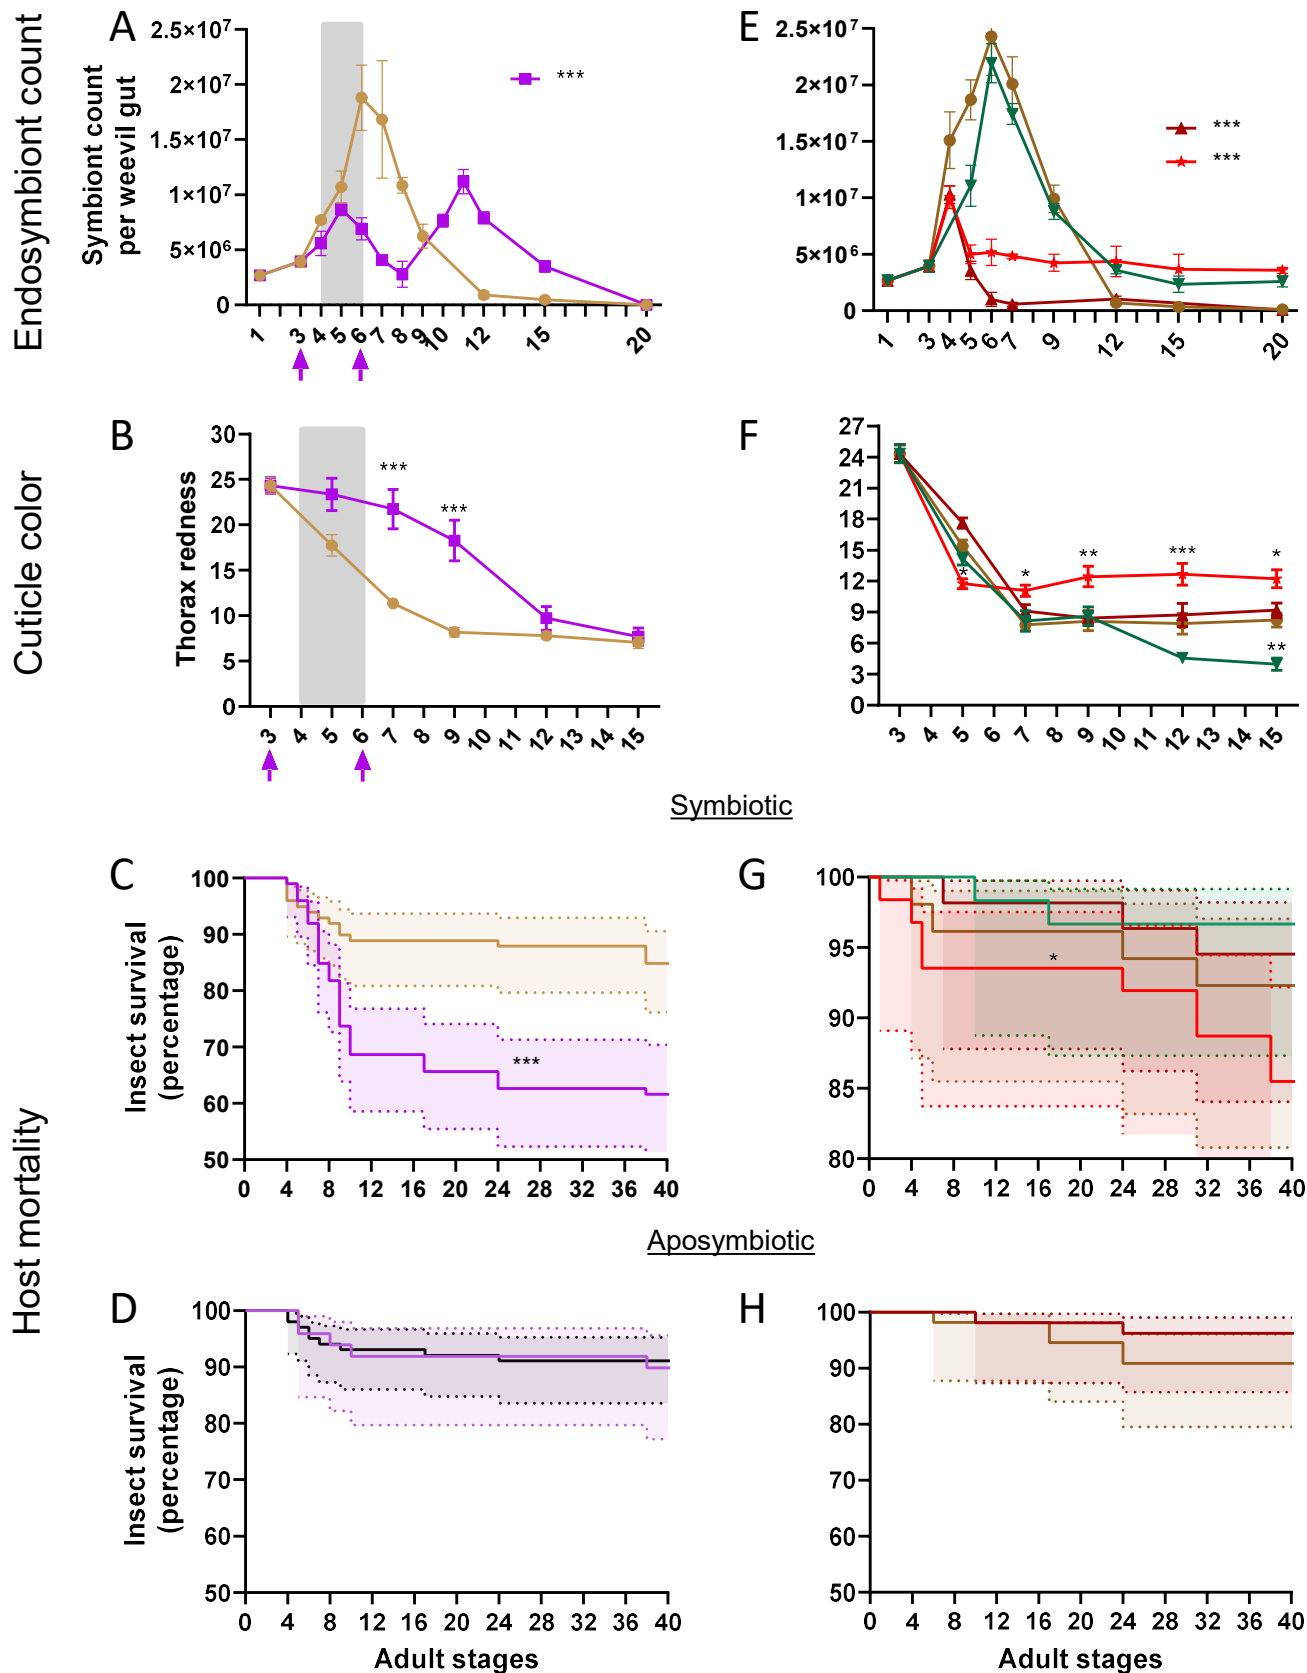

**Host developmental stage**

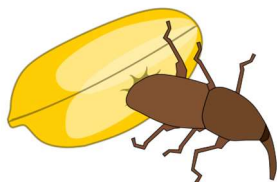

Young adult at emergence

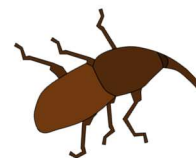

Fully-developed adult

**Bacterial load**

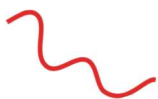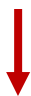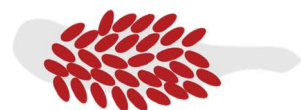

Insect gut – endosymbionts proliferating in caeca

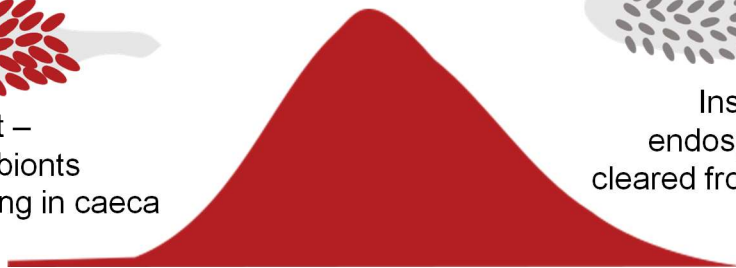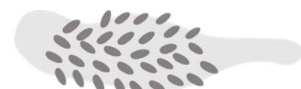

Insect gut – endosymbionts cleared from caeca

**Effects on host fitness**

**Sugar-dependent proliferation in insect caeca**

**Host-controlled clearance**

Balanced diet

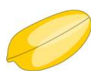

no effect on survival, cuticle tanning or fecundity

Starvation

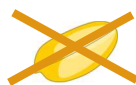

Higher mortality

Severely unbalanced diet

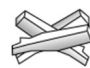

Partial compensation for cuticle tanning and survival

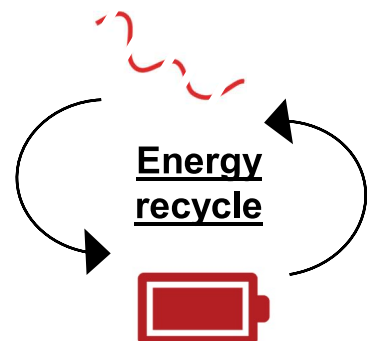

Source: https://www.biorxiv.org/content/10.1101/2022.07.06.498660v1.full.pdf
